# Supplementary material for: Using the tracer flux ratio method with flight measurements to estimate dairy farm CH 4 emissions in central California
Source: Copernicus journal article supplement (doi:10.5194/amt-12-2085-2019), 2019-04-04
Supplement: Supplementary file 1 [file amt-12-2085-2019-supplement.zip]

Archive with 3 entries (3 files):
- SM Dataset.xlsx
- daube_SI.pdf
- amt-12-2085-2019-supplement-title-page.pdf
