# Supplementary material for: Using the tracer flux ratio method with flight measurements to estimate dairy farm CH 4 emissions in central California
Source: Copernicus journal article supplement (doi:10.5194/amt-12-2085-2019), 2019-04-04
Supplement: Supplementary file 1 [file amt-12-2085-2019-supplement.zip › amt-12-2085-2019-supplement-title-page.pdf]

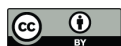

## *Supplement of*

# **Using the tracer flux ratio method with flight measurements to estimate dairy farm CH<sub>4</sub> emissions in central California**

**Conner Daube et al.**

*Correspondence to:* Conner Daube ([daube@aerodyne.com](mailto:daube@aerodyne.com))

- [amt-12-2085-2019-supplement-title-page.pdf](#)
- [SM Dataset.xlsx](#)
- [daube\\_SI.pdf](#)

The copyright of individual parts of the supplement might differ from the CC BY 4.0 License.
