# Supplementary material for: Using the tracer flux ratio method with flight measurements to estimate dairy farm CH 4 emissions in central California
Source: Copernicus journal article supplement (doi:10.5194/amt-12-2085-2019), 2019-04-04
Supplement: Supplementary file 1 [file amt-12-2085-2019-supplement.zip › daube_SI.pdf]

## A. Validation methods

The goal in applying validation methods to this dataset was to evaluate the potential level of bias present when an analyst designates plume associations (“whole site”, “animal”, and “manure”) for the purpose of separating out emissions by source. Two validation techniques were compared with the primary dataset to identify areas of potential bias: 1) a simple model employing only wind direction with aircraft position and 2) a “hands-off” analysis allowing almost all of the data collected to be considered as valid.

For the simple model, sections were drawn upon a map of each site based on their likelihood of representing a plume from a distinct source or the whole site, given a consistent wind originating from a particular range of directions (Figure S1). When the aircraft flew into one of these sections, if the wind direction at the point of highest concentration during an enhancement fell into a specified range, a source designation was made. Emission estimates for each source were summed together and compared to the main dataset. Figure S1 visualizes sections of Dairy 2 defined in the model, overlaid on top of all the transects flown by the aircraft at this site.

In contrast to the primary analysis, the “hands-off” approach analyzed a broad set of data, containing all well-correlated plumes ( $R^2 > 0.5$ ) that had resulted in positive emissions at times when the tracer gas was flowing. Data that had undergone minor quality requirements (“minor QA”) overall provided averaged emissions that closely resemble the primary dataset for Dairy 1 ( $4,161 \pm 535$ ;  $n = 159$ ) and Dairy 2 ( $6,242 \pm 1,855$ ;  $n = 275$ ).

Using the minor QA dataset, this model yielded similar plume designations with a high success rate (Table S1; 115 out of 153 for Dairy 1; 65 out of 80 for Dairy 2). Within this selected set of plumes, emission estimates for Dairy 1 whole site (97%<sub>ARI</sub>) and cow (94%<sub>ARI</sub>) categories closely matched ARI findings. Model-based whole site estimates for Dairy 2 (116%<sub>ARI</sub>) also resembled ARI results. Given the variability and scarcity of measurements related to manure management, it is difficult to have much confidence in the manure estimates. Seeing how the model performed exceedingly well considering only a couple of basic factors, it makes sense to nominate wind direction and sampling point as major determinants of plume origin. While these factors ignore many nuances that still require human judgement, it is clear that the results tend to agree with findings from the manually filtered dataset.

## B. CH<sub>4</sub>:CO<sub>2</sub> ratios

Some studies utilize CO<sub>2</sub> measurements combined with the CH<sub>4</sub>:CO<sub>2</sub> ratio to quantify enteric CH<sub>4</sub> emissions from ruminants (Madsen et al., 2010; Haque et al., 2014). One study compared breath samples between cows with varied feed concentrates and saw a similar ratio (~0.1 CH<sub>4</sub>:CO<sub>2</sub>) in both scenarios (Haque et al., 2014). Another study that measured cow breath while feeding (using two different methods to collect samples) saw a mean CH<sub>4</sub>:CO<sub>2</sub> ratio of 0.09-0.11 across two experiments comparing multiple methods (Huhtanen et al., 2015). Values of CH<sub>4</sub>:CO<sub>2</sub> from this study compare favorably to other studies of dairy cows (Table S1). Using all the plumes from this project provided a significant dataset of CH<sub>4</sub>:CO<sub>2</sub> ratios ( $n = 123$  at Dairy 1;  $n = 106$  at Dairy 2) that range from  $0.08 \pm 0.01$  (Dairy 1) to  $0.13 \pm 0.04$  (Dairy 2).

Agreement between this study, the literature, and ARI findings indicate that not only is it possible to quickly obtain repeatable CH<sub>4</sub>:CO<sub>2</sub> ratios using a mobile lab, but it is also feasible when flying above at rapid speeds. Average ratios of CH<sub>4</sub>:CO<sub>2</sub> were calculated from plumes well-correlated ( $R^2 > 0.5$ ) between CH<sub>4</sub> with both C<sub>2</sub>H<sub>6</sub> and CO<sub>2</sub> (Table S1). This study provided more CH<sub>4</sub>:CO<sub>2</sub> ratios than the ground-based study with similar results. Average CH<sub>4</sub>:CO<sub>2</sub> ratios sorted by source in the minor QA dataset follow the manual QA dataset as well, with an average of  $0.08 \pm 0.01$  (n = 123) at Dairy 1 and  $0.13 \pm 0.04$  (n = 106) at Dairy 2. These ratio values only apply to whole site estimates since this dataset did not sort data into source categories.

## References

- Arndt, C., Leytem, A. B., Hristov, A., Zavala-Araiza, D., Cativiela, J. P., Conley, S., Daube, C., Faloona, I., and Herndon, S. C.: Case Study: Short-Term Methane Emissions from Two Dairy Farms in California Estimated by Different Measurement Techniques and USEPA Inventory Methodology, J. Dairy Sci., <https://doi.org/10.3168/jds.2017-13881>, 2018, In press.
- Haque, M. N., Cornou, C., and Madsen, J.: Estimation of methane emission using the CO<sub>2</sub> method from dairy cows fed concentrate with different carbohydrate compositions in automatic milking system, Livest. Sci., 164, 57-66, <https://doi.org/10.1016/j.livsci.2014.03.004>, 2014.
- Huhtanen, P., Cabezas-Garcia, E. H., Utsumi, S., and Zimmerman, S.: Comparison of methods to determine methane emissions from dairy cows in farm conditions, J. Dairy Sci., 98, 3394-3409, <https://doi.org/10.3168/jds.2014-9118>, 2015.
- Madsen, J., Bjerg, B. S., Hvelplund, T., Weisbjerg, M. R., and Lund, P.: Methane and carbon dioxide ratio in excreted air for quantification of the methane production from ruminants, Livest. Sci., 129, 223-227, <https://doi.org/10.1016/j.livsci.2010.01.001>, 2010.

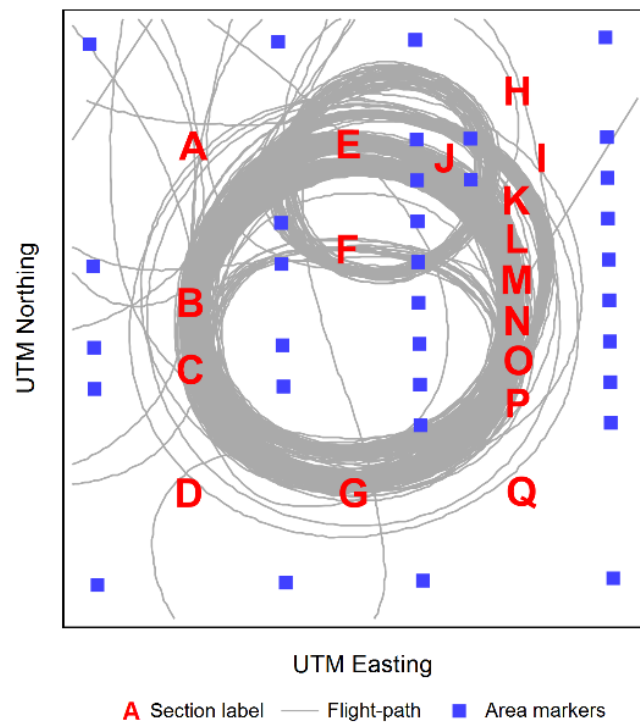

**Figure S1. Map of Dairy 2 divided into sections selected to distinguish sources on-site through unique associations of wind direction and physical location.**

5

10

15

20

25

**Table S1. Comparison of methane:carbon dioxide (CH<sub>4</sub>:CO<sub>2</sub>) ratios between sites and measurement methods.**

| Site                                                                  | Tracer-Plane         | ARI <sup>*</sup> |
|-----------------------------------------------------------------------|----------------------|------------------|
| [CH <sub>4</sub> :CO <sub>2</sub> ratio (ppm:ppm) ± 95% C.I. (count)] |                      |                  |
| Dairy 1                                                               |                      |                  |
| Whole-Site                                                            | 0.13 ± 0.03 (n = 12) | 0.05 ± 0.03 (5)  |
| Animal housing                                                        | 0.06 ± 0.01 (18)     | 0.06 ± 0.004 (7) |
| Dairy 2                                                               |                      |                  |
| Whole-Site                                                            | 0.12 ± 0.11 (3)      | 0.08 ± 0.13 (9)  |
| Animal housing                                                        | 0.04 ± 0.02 (9)      | 0.11 ± 0.04 (4)  |

<sup>\*</sup>Ground-based measurement emission estimates from Arndt et al., 2018.

5

10

15

20

25

**Table S2. Predicted methane (CH<sub>4</sub>) emissions and methane:carbon dioxide (CH<sub>4</sub>:CO<sub>2</sub>) ratios from the simple model using the minor QA dataset, compared to Aerodyne ground-based measurements (Arndt et al., 2018).**

| Source         | Count | Emission                              | Fraction* | CH <sub>4</sub> :CO <sub>2</sub> |
|----------------|-------|---------------------------------------|-----------|----------------------------------|
|                | [n]   | [kg CH <sub>4</sub> d <sup>-1</sup> ] | [% ARI]   | [ppm:ppm]                        |
| Dairy 1        |       |                                       |           |                                  |
| Whole-Site     | 45    | 6,747                                 | 97%       | 0.09                             |
| Animal housing | 50    | 2,873                                 | 94%       | -                                |
| Liquid Manure  | 20    | 20,931                                | 349%      | -                                |
| Dairy 2        |       |                                       |           |                                  |
| Whole-Site     | 54    | 4,285                                 | 116%      | 0.06                             |
| Animals        | -     | -                                     | -         | -                                |
| Liquid Manure  | 11    | 4,758                                 | 222%      | -                                |

\*Ground-based measurement emission estimates from Arndt et al., 2018.
