# Supplementary material for: Using the tracer flux ratio method with flight measurements to estimate dairy farm CH 4 emissions in central California
Source: Copernicus journal article supplement (doi:10.5194/amt-12-2085-2019), 2019-04-04
Supplement: Supplementary file 1 [file amt-12-2085-2019-supplement.zip › SM Dataset.xlsx]

## Sheet: Dataset
Plume ID	Site ID	Source Designation	Measurement Duration (s)	CH4 Emission Rate (kg hr-1)	Plane Altitude (m)	Plane-Tracer Release Distance (km)	Wind Direction (degrees)	Wind Speed (m s-1)	CH4/C2H6 (R2)
1	Dairy 2	Whole site	24	194	269	1.2	342	4.9	0.77
2	Dairy 2	Whole site	24	161	367	1.3	339	4.8	0.78
3	Dairy 2	Whole site	25	196	533	1.4	333	5.9	0.87
4	Dairy 2	Whole site	32	117	558	1.4	338	6.5	0.86
5	Dairy 2	Whole site	21	215	550	1.4	339	5	0.75
6	Dairy 2	Whole site	28	166	525	1.3	331	5.6	0.78
7	Dairy 2	Cows	40	110	491	1.2	341	6.1	0.59
8	Dairy 2	Whole site	21	76	467	1.4	336	5.8	0.87
9	Dairy 2	Whole site	25	146	235	1.2	332	5	0.93
10	Dairy 2	Whole site	22	123	212	1.3	332	5.2	0.8
11	Dairy 2	Whole site	19	148	269	1.9	265	4.7	0.81
12	Dairy 2	Whole site	48	215	526	1.7	340	4.5	0.91
13	Dairy 2	Whole site	11	201	607	1.8	340	3.7	0.6
14	Dairy 2	Whole site	29	245	662	1.9	332	4.1	0.78
15	Dairy 2	Whole site	27	231	737	1.8	320	3.6	0.72
16	Dairy 2	Whole site	25	208	672	1.9	332	4.7	0.62
17	Dairy 2	Cows	15	73	121	1.3	345	4	0.54
18	Dairy 2	Cows	9	121	146	1.3	338	5.7	0.81
19	Dairy 2	Cows	10	37	271	1.4	339	5.6	0.9
20	Dairy 2	Cows	11	57	330	1.4	346	5.8	0.83
21	Dairy 2	Cows	14	37	534	1.4	243	6.3	0.88
22	Dairy 2	Lagoon	19	209	387	1	316	7.3	0.63
23	Dairy 2	Lagoon	18	270	505	0.7	295	5.3	0.62
24	Dairy 2	Whole site	23	159	214	1.2	200	3.3	0.63
25	Dairy 2	Whole site	26	168	180	1.2	193	3.3	0.65
26	Dairy 2	Whole site	26	145	153	1.2	137	2.9	0.56
27	Dairy 2	Whole site	26	252	239	1.4	282	3.3	0.78
28	Dairy 2	Whole site	27	235	243	1.4	123	3.1	0.68
29	Dairy 2	Cows	28	126	309	1.4	274	3.1	0.53
30	Dairy 2	Whole site	28	160	337	1.4	155	3.1	0.77
31	Dairy 2	Cows	34	33	428	1.4	298	3.6	0.69
32	Dairy 2	Whole site	35	142	592	1.4	324	4.7	0.61
33	Dairy 2	Lagoon	13	201	527	1	314	4.2	0.74
34	Dairy 2	Lagoon	20	185	295	0.7	148	5.7	0.66
35	Dairy 1	Cows	22	156	208	0.9	254	3.2	0.85
36	Dairy 1	Cows	18	195	274	1	304	2.7	0.58
37	Dairy 1	Cows	25	164	310	0.9	332	3.1	0.85
38	Dairy 1	Whole site	24	232	349	0.9	326	3	0.84
39	Dairy 1	Cows	31	135	373	0.8	334	2.6	0.75
40	Dairy 1	Cows	15	111	439	1	333	2.6	0.76
41	Dairy 1	Cows	20	114	544	1	329	1.5	0.72
42	Dairy 1	Cows	19	96	511	1	307	1.5	0.82
43	Dairy 1	Cows	26	123	508	1.1	309	2.2	0.82
44	Dairy 1	Cows	14	95	509	1.3	249	1.8	0.9
45	Dairy 1	Cows	16	115	485	0.9	309	1.6	0.71
46	Dairy 1	Whole site	7	157	479	1.3	318	2.6	0.82
47	Dairy 1	Cows	38	177	438	1	282	2.1	0.85
48	Dairy 1	Cows	37	254	409	1	308	2	0.57
49	Dairy 1	Whole site	22	259	282	1.1	301	1.7	0.53
50	Dairy 1	Whole site	28	313	161	1	238	1.5	0.53
51	Dairy 1	Cows	27	195	123	1	195	1.2	0.68
52	Dairy 1	Whole site	33	264	103	1	205	1.5	0.88
53	Dairy 1	Whole site	31	328	100	1	218	1.7	0.8
54	Dairy 1	Whole site	32	334	124	1	235	1.5	0.73
55	Dairy 1	Cows	26	187	186	1	262	1.7	0.79
56	Dairy 1	Cows	33	170	259	1	302	1.6	0.8
57	Dairy 1	Cows	20	100	381	0.9	224	4	0.57
58	Dairy 1	Cows	20	85	416	0.9	216	4.6	0.89
59	Dairy 1	Cows	15	26	446	1	217	4	0.95
60	Dairy 1	Cows	17	83	489	1	218	5	0.61
61	Dairy 1	Cows	17	64	289	0.9	217	6	0.57
62	Dairy 1	Cows	19	60	236	0.8	216	5.5	0.52
63	Dairy 1	Cows	20	147	219	0.9	217	5.9	0.88
64	Dairy 1	Cows	20	93	154	0.8	210	5.7	0.56
65	Dairy 1	Whole site	12	417	111	1.7	205	5.6	0.78
66	Dairy 1	Cows	19	82	118	1.1	215	6.1	0.65
67	Dairy 1	Whole site	28	349	98	0.9	218	5.9	0.69
68	Dairy 1	Cows	16	80	148	1	221	6.3	0.85
69	Dairy 1	Cows	26	64	149	0.9	220	5.8	0.73
70	Dairy 1	Cows	16	56	183	1.2	219	6.2	0.76
71	Dairy 1	Cows	18	22	214	0.9	224	5.7	0.79
72	Dairy 1	Cows	15	36	245	1.1	224	6.2	0.91
73	Dairy 1	Cows	20	43	283	1	224	5.7	0.74
74	Dairy 1	Cows	19	59	320	1	224	5.5	0.8
75	Dairy 1	Cows	15	82	346	1.1	226	5.5	0.88
76	Dairy 1	Cows	17	25	448	1	238	5.2	0.76
77	Dairy 1	Cows	20	35	252	1	216	5.7	0.77
78	Dairy 1	Cows	20	57	113	1	220	5.1	0.91
79	Dairy 1	Cows	13	31	103	0.4	213	7.3	0.81
80	Dairy 1	Whole site	34	204	273	1.5	332	3.8	0.66
81	Dairy 1	Whole site	35	219	309	1.5	330	3.7	0.94
82	Dairy 1	Whole site	36	267	339	1.4	326	3.7	0.86
83	Dairy 1	Whole site	36	170	378	1.5	333	4.1	0.85
84	Dairy 1	Whole site	31	261	439	1.6	315	4.7	0.85
85	Dairy 1	Whole site	22	223	185	0.6	221	2	0.91
86	Dairy 1	Cows	23	58	217	0.7	219	2.2	0.51
87	Dairy 1	Cows	20	60	250	0.7	208	2.4	0.94
88	Dairy 1	Whole site	23	238	408	0.7	204	1.7	0.93
89	Dairy 1	Whole site	29	262	448	0.7	221	1.6	0.93
90	Dairy 1	Cows	26	81	845	1.2	255	2	0.69
91	Dairy 1	Cows	20	95	570	0.9	211	2.2	0.87
92	Dairy 1	Whole site	23	398	122	0.9	202	4.5	0.96
